# Supplementary material for: Identification of shared risk loci and pathways for bipolar disorder and schizophrenia
Source: PLoS One. 2017 Feb 6;12(2):e0171595. doi: 10.1371/journal.pone.0171595 (PMC5293228; doi:10.1371/journal.pone.0171595)
Supplement: S1 Table — Single nucleotide polymorphisms (SNPs) are shown according to their p-values in our bipolar disorder (BD) GWAS [12] following correction for sample overlap. Chromosomal positions refer to genome build GRCh37 (hg19). An imputation accuracy metric of 1 indicates that the respective SNP was not imputed using ImpG-Summary. Abbreviations: Chr, chromosome; A1, the allele to which the z-score is predicted; A2, other allele; Z/P BD Meta, z-score/p-value in our BD GWAS [12] after correction for sample overlap; Pcorr BD Meta, p-value in our BD GWAS [12] after correction for sample overlap and Bonferroni correction for multiple testing; Z/P PGC SCZ (discovery), derived z-score/p-value in the PGC schizophrenia GWAS (discovery phase) [14]. (XLSX) [file pone.0171595.s001.xlsx]

## Sheet: S1 Table
SNP	Chr	Position	A1	A2	Z BD Meta	P BD Meta	Pcorr BD Meta	ImpG imputation accuracy metric	Z PGC SCZ (discovery)	P PGC SCZ (discovery)
rs75968099	3	36858583	T	C	4.26208	2.02532e-05	0.00224811	0.971378	6.9908	2.73329e-12
rs2535627	3	52845105	T	C	4.0712	4.67716e-05	0.00519165	1	6.6224	3.53404e-11
rs6704641	2	200164252	A	G	2.96765	0.00300087	0.333096	1	5.52185	3.35454e-08
rs140505938	1	150031490	T	C	-2.94394	0.00324061	0.359708	0.979551	-6.13516	8.50737e-10
rs7893279	10	18745105	T	G	2.85547	0.00429727	0.476997	1	6.61383	3.74498e-11
rs6704768	2	233592501	A	G	-2.73184	0.00629812	0.699091	1	-6.962	3.35464e-12
rs12704290	7	86427626	A	G	-2.67418	0.00749128	0.831532	0.974767	-6.46028	1.0451e-10
rs211829	7	110048893	T	C	2.61939	0.00880871	0.977766	1	5.00941	5.45967e-07
rs3735025	7	137074844	T	C	2.58292	0.0097969	>0,9999	0.9914	5.79069	7.00996e-09
rs324017	12	57487814	A	C	-2.58106	0.00984983	>0,9999	0.924671	-5.20489	1.94116e-07
rs2909457	2	162845855	A	G	-2.5457	0.0109058	>0,9999	0.985942	-5.46265	4.6909e-08
rs9922678	16	9946319	A	G	2.51075	0.0120474	>0,9999	1	5.80202	6.55203e-09
rs950169	15	84706461	T	C	-2.36387	0.0180849	>0,9999	1	-6.49137	8.50584e-11
rs55661361	11	124613957	A	G	-2.1693	0.0300603	>0,9999	0.969365	-6.93849	3.96326e-12
rs10043984	5	137712121	T	C	2.16154	0.0306536	>0,9999	0.980366	5.59148	2.25144e-08
rs1498232	1	30433951	T	C	2.1404	0.0323223	>0,9999	0.980655	6.07818	1.2155e-09
rs6434928	2	198304577	A	G	-2.1077	0.035057	>0,9999	0.849564	-6.7253	1.75229e-11
rs2007044	12	2344960	A	G	-2.08913	0.0366964	>0,9999	1	-8.48149	2.22332e-17
rs8044995	16	68189340	A	G	2.07472	0.0380121	>0,9999	1	5.51075	3.57318e-08
rs56205728	15	40567237	A	G	2.06755	0.0386828	>0,9999	0.863105	5.45182	4.98568e-08
rs2693698	14	99719219	A	G	-2.0247	0.0428978	>0,9999	1	-5.67601	1.37874e-08
rs832187	3	63833050	T	C	-1.99074	0.0465089	>0,9999	1	-5.56837	2.57131e-08
rs16867576	5	88746331	A	G	1.86876	0.0616566	>0,9999	1	5.6687	1.43888e-08
rs7907645	10	104423800	T	G	1.8399	0.0657836	>0,9999	0.601739	6.56201	5.30889e-11
rs3849046	5	137851192	T	C	1.80256	0.071458	>0,9999	1	5.86004	4.62747e-09
rs11682175	2	57987593	T	C	-1.74671	0.080688	>0,9999	1	-6.99959	2.5671e-12
rs17194490	3	2547786	T	G	1.68699	0.0916055	>0,9999	1	6.56078	5.35284e-11
rs3768644	2	72361505	A	G	1.60662	0.108138	>0,9999	0.927317	-5.27552	1.32384e-07
rs59979824	2	193848340	A	C	-1.59955	0.109699	>0,9999	0.84287	-5.72381	1.04159e-08
rs6065094	20	37453194	A	G	-1.5304	0.125917	>0,9999	1	-6.56599	5.16889e-11
rs7405404	16	13749859	T	C	1.4541	0.145917	>0,9999	0.993565	6.26422	3.74699e-10
rs2905426	19	19478022	T	G	-1.44751	0.147755	>0,9999	0.910794	-5.78618	7.20048e-09
rs11191419	10	104612335	A	T	-1.43877	0.150215	>0,9999	0.891876	-8.59639	8.22664e-18
rs679087	12	29917265	A	C	-1.37973	0.16767	>0,9999	0.954897	-5.407	6.40888e-08
rs10803138	1	243555219	A	G	-1.37661	0.168632	>0,9999	1	-5.61889	1.92183e-08
rs1339227	6	73155701	T	C	-1.36704	0.171614	>0,9999	1	-5.39627	6.80392e-08
rs9841616	3	181167585	A	T	-1.33638	0.181425	>0,9999	1	-5.64339	1.66738e-08
rs6984242	8	60700469	A	G	-1.32374	0.185589	>0,9999	0.9951	-6.01868	1.75846e-09
rs6002655	22	42603814	T	C	1.32131	0.186398	>0,9999	0.912275	6.04588	1.48597e-09
rs2239063	12	2511831	A	C	1.31368	0.188953	>0,9999	1	5.84776	4.98244e-09
rs111294930	5	152177121	A	G	1.31032	0.190088	>0,9999	0.752705	6.07708	1.22393e-09
rs11693094	2	185601420	T	C	-1.301	0.193259	>0,9999	0.946689	-6.85067	7.35061e-12
rs2514218	11	113392994	T	C	-1.28136	0.200066	>0,9999	1	-6.22458	4.82837e-10
rs11027857	11	24403620	A	G	-1.26348	0.206416	>0,9999	1	5.90558	3.51409e-09
rs1501357	5	45364875	T	C	-1.25613	0.20907	>0,9999	1	-5.70919	1.13515e-08
rs115329265	6	28712247	A	G	-1.23997	0.214986	>0,9999	0.670937	11.7682	5.69584e-32
rs215411	4	23423603	A	T	1.23747	0.215911	>0,9999	1	5.68457	1.31141e-08
rs12691307	16	29939877	A	G	1.23233	0.217825	>0,9999	0.875089	6.41802	1.38056e-10
rs75575209	2	58138192	A	T	-1.19483	0.232154	>0,9999	0.821889	-5.72941	1.00782e-08
rs7801375	7	131567263	A	G	-1.17417	0.240328	>0,9999	1	-5.60819	2.04451e-08
rs7267348	20	48131036	T	C	-1.11253	0.26591	>0,9999	1	-5.30556	1.12329e-07
rs4391122	5	60598543	A	G	-1.10686	0.268356	>0,9999	1	-7.37407	1.65499e-13
rs12887734	14	104046834	T	G	1.07517	0.282298	>0,9999	0.94995	7.44478	9.71095e-14
rs73229090	8	27442127	A	C	1.06941	0.284885	>0,9999	0.866089	-5.62147	1.89344e-08
rs11139497	9	84739941	A	T	-1.05182	0.292882	>0,9999	1	5.91342	3.35067e-09
rs12826178	12	57622371	T	G	1.00822	0.313349	>0,9999	0.69869	-6.90111	5.15971e-12
rs8082590	17	17958402	A	G	-0.972254	0.330924	>0,9999	0.940859	-5.79124	6.98669e-09
rs2068012	14	30190316	T	C	-0.95195	0.341122	>0,9999	1	-5.47591	4.35273e-08
rs4702	15	91426560	A	G	-0.92546	0.354727	>0,9999	1	-7.00044	2.55167e-12
rs4129585	8	143312933	A	C	0.877607	0.380157	>0,9999	1	7.32752	2.34454e-13
rs4388249	5	109036066	T	C	0.872468	0.382953	>0,9999	1	5.33365	9.62557e-08
rs2332700	14	72417326	C	G	0.821329	0.411459	>0,9999	0.986299	6.00795	1.8789e-09
rs14403	1	243663893	T	C	-0.80584	0.420335	>0,9999	0.958123	-5.28913	1.229e-07
rs12421382	11	109378071	T	C	0.775959	0.437773	>0,9999	1	-5.23032	1.69214e-07
rs9607782	22	41587556	A	T	0.717337	0.473166	>0,9999	0.867745	6.85063	7.35237e-12
rs10520163	4	170626552	T	C	0.714117	0.475155	>0,9999	1	5.74505	9.1894e-09
rs4523957	17	2208899	T	G	0.699728	0.484097	>0,9999	1	6.09851	1.07062e-09
rs72934570	18	53533189	T	C	-0.667287	0.504589	>0,9999	0.933323	-6.95683	3.48007e-12
rs12129573	1	73768366	A	C	0.63205	0.527354	>0,9999	0.991934	6.30868	2.81429e-10
rs76869799	1	97834525	C	G	0.615297	0.538358	>0,9999	0.545646	-5.25875	1.45037e-07
rs2053079	19	30987423	A	G	-0.590724	0.554705	>0,9999	1	-5.91146	3.39082e-09
rs77502336	11	123394636	C	G	0.579293	0.562392	>0,9999	0.949906	5.99971	1.9767e-09
rs10791097	11	130718630	T	G	0.559257	0.575987	>0,9999	1	6.97177	3.12968e-12
rs11685299	2	225391296	A	C	-0.519998	0.603065	>0,9999	0.967826	-5.73498	9.75264e-09
rs11210892	1	44100084	A	G	0.512893	0.608026	>0,9999	1	-6.20537	5.45684e-10
rs10860964	12	103596455	T	C	0.462284	0.643878	>0,9999	1	5.34519	9.03231e-08
rs75059851	11	133822569	A	G	-0.445866	0.655694	>0,9999	0.960253	6.8003	1.04402e-11
rs12522290	5	152797656	C	G	0.427406	0.669084	>0,9999	1	5.58476	2.34022e-08
rs1023500	22	42340844	T	C	-0.425323	0.670602	>0,9999	1	5.45212	4.97741e-08
rs2973155	5	152608619	T	C	0.393426	0.694005	>0,9999	0.982154	-6.11864	9.43789e-10
rs4330281	3	17859366	T	C	-0.39318	0.694186	>0,9999	0.98697	-5.45381	4.93029e-08
rs11740474	5	153680747	A	T	0.391516	0.695416	>0,9999	0.94495	-5.50442	3.70377e-08
rs13240464	7	110898915	T	C	0.357268	0.720891	>0,9999	0.98651	7.19666	6.1707e-13
rs36068923	8	111485761	A	G	-0.345678	0.729585	>0,9999	0.99283	-6.46164	1.03572e-10
rs1106568	4	176861301	A	G	-0.344468	0.730494	>0,9999	1	-5.68883	1.27916e-08
rs6466055	7	104929064	A	C	0.318312	0.750248	>0,9999	0.9934	5.95466	2.60619e-09
rs12903146	15	61854663	A	G	0.30644	0.75927	>0,9999	0.992123	6.1136	9.74111e-10
rs7523273	1	207977083	A	G	0.303076	0.761832	>0,9999	0.979874	5.22586	1.73345e-07
rs55833108	10	104741583	T	G	-0.288556	0.772921	>0,9999	0.936834	5.67647	1.37505e-08
rs2851447	12	123665113	C	G	-0.265242	0.790823	>0,9999	1	-7.64685	2.05965e-14
rs79212538	5	151993104	T	G	0.224336	0.822496	>0,9999	0.962332	5.494	3.92939e-08
rs117074560	6	96459651	T	C	0.221824	0.824451	>0,9999	0.787271	-5.65326	1.57432e-08
rs35518360	4	103146890	A	T	-0.189199	0.849937	>0,9999	0.862947	-7.13274	9.83916e-13
rs9636107	18	53200117	A	G	0.177416	0.859182	>0,9999	1	-7.12158	1.06695e-12
rs6670165	1	177280121	T	C	-0.145841	0.884047	>0,9999	1	5.28125	1.28305e-07
rs7432375	3	136288405	A	G	-0.139779	0.888834	>0,9999	1	-6.5504	5.7384e-11
rs7819570	8	89588626	T	G	0.130365	0.896278	>0,9999	0.978448	5.62773	1.82595e-08
rs12148337	15	70589272	T	C	0.123526	0.901691	>0,9999	1	5.46672	4.58428e-08
rs4648845	1	2387101	T	C	-0.119696	0.904724	>0,9999	1	5.89774	3.68518e-09
rs12325245	16	58681393	A	T	0.10594	0.91563	>0,9999	1	-5.71245	1.11359e-08
rs8042374	15	78908032	A	G	0.0726305	0.9421	>0,9999	1	7.05628	1.71014e-12
rs4240748	12	92246786	C	G	-0.0575711	0.95409	>0,9999	1	-5.32456	1.01196e-07
rs715170	18	53795514	T	C	0.0377103	0.969919	>0,9999	1	-5.51699	3.44851e-08
rs1702294	1	98501984	T	C	0.0347196	0.972303	>0,9999	0.995312	-8.44545	3.0287e-17
rs9420	11	57510294	A	G	0.0236074	0.981166	>0,9999	1	5.39832	6.72676e-08
rs4766428	12	110723245	T	C	0.0120426	0.990392	>0,9999	0.928246	6.17112	6.78085e-10
rs10503253	8	4180844	A	C	-0.00471834	0.996235	>0,9999	1	5.58239	2.37231e-08
